# Supplementary material for: The Next Step in Understanding Impaired Reactive Balance Control in People With Stroke: The Role of Defective Early Automatic Postural Responses
Source: PubMed Central journal article supplement — Neurorehabil Neural Repair. 2017 Jul 8;31(8):708–16. doi: 10.1177/1545968317718267 (PMC5714159; doi:10.1177/1545968317718267), 2017-07-08
Supplement: Supplementary_Table.pdf [file Supplementary_Table.pdf]

**Supplementary Table**

| <b><i>Balance capacity</i></b>                                                                           |                                                                                                                                                                                                                                                                                                                              |                                                                                                                                                                                                                                                                                 |
|----------------------------------------------------------------------------------------------------------|------------------------------------------------------------------------------------------------------------------------------------------------------------------------------------------------------------------------------------------------------------------------------------------------------------------------------|---------------------------------------------------------------------------------------------------------------------------------------------------------------------------------------------------------------------------------------------------------------------------------|
| <b>Analysis</b>                                                                                          | <b>Outcomes used</b>                                                                                                                                                                                                                                                                                                         | <b>Statistical methods</b>                                                                                                                                                                                                                                                      |
| Between-group comparison single and multiple stepping threshold                                          | <ul style="list-style-type: none"> <li>- Single and multiple stepping thresholds in each direction.</li> <li>- In controls, values for leftward and rightward perturbations were averaged for comparison to paretic and non-paretic leg in the stroke group.</li> </ul>                                                      | Independent samples t-test for each direction separately.                                                                                                                                                                                                                       |
| Compare single and multiple stepping thresholds between paretic and non-paretic legs in the stroke group | Single and multiple stepping thresholds for perturbations towards paretic and non-paretic side in the stroke group.                                                                                                                                                                                                          | Paired samples t-test.                                                                                                                                                                                                                                                          |
| Between-group comparison of sideways multiple stepping thresholds based on step strategy                 | <ul style="list-style-type: none"> <li>- Multiple stepping thresholds were classified as 'side step' or 'no side step' based on the trial obtained at the multiple stepping threshold</li> <li>- For controls, values for left and right were not averaged as step strategy sometimes differed between sides.</li> </ul>     | One way ANOVA                                                                                                                                                                                                                                                                   |
| Compare number of side step strategies per leg                                                           | Step strategy was determined for all trials collected at the sideways multiple stepping thresholds                                                                                                                                                                                                                           | Chi-square test                                                                                                                                                                                                                                                                 |
| <b><i>Postural muscle responses</i></b>                                                                  |                                                                                                                                                                                                                                                                                                                              |                                                                                                                                                                                                                                                                                 |
| <b>Analysis</b>                                                                                          | <b>Outcomes used</b>                                                                                                                                                                                                                                                                                                         | <b>Statistical methods</b>                                                                                                                                                                                                                                                      |
| Between group comparison for EMG onsets and amplitudes                                                   | <ul style="list-style-type: none"> <li>- EMG outcomes were obtained for using collected at two fixed perturbation intensity levels (LOW: 0.5 m/s<sup>2</sup>, HIHG 1.5 m/s<sup>2</sup>)</li> <li>- Values for left and right leg were averaged for controls.</li> </ul>                                                      | Linear Mixed Model with EMG variable (onset or amplitude) as the dependent variable and the following predictors: LEG (paretic, non-paretic, control), MUSCLE, INTENSITY)                                                                                                       |
| <b><i>Postural muscle responses as determinants of balance capacity</i></b>                              |                                                                                                                                                                                                                                                                                                                              |                                                                                                                                                                                                                                                                                 |
| <b>Analysis</b>                                                                                          | <b>Outcomes used</b>                                                                                                                                                                                                                                                                                                         | <b>Statistical methods</b>                                                                                                                                                                                                                                                      |
| Identifying EMG outcomes predictive of single and multiple stepping thresholds                           | <ul style="list-style-type: none"> <li>- EMG variables obtained at the two fixed perturbation intensities.</li> <li>- Single and multiple stepping thresholds</li> <li>- Values for left and right leg were averaged for controls.</li> <li>- In the stroke group only the outcomes in the paretic leg were used.</li> </ul> | <ul style="list-style-type: none"> <li>- Linear regression analysis with single or multiple stepping threshold as the dependent variable and EMG variables as the predictors.</li> <li>- Separate regression analysis was performed for each perturbation direction.</li> </ul> |
